# Supplementary material for: Oncolytic HSV-CD44 Reprograms One-Carbon Metabolism to Modulate AKT and MAPK Signaling in Glioblastoma Stem Cells
Source: Research Square preprint supplement (doi:10.21203/rs.3.rs-7111399/v1), 2025-08-19
Supplement: Supplementary file 1 [file 36f5a92bd1ebf8ac7a589649.docx]

Supplementary figure

Manuscript: Oncolytic HSV-CD44 Reprograms One-Carbon Metabolism to Modulate AKT and MAPK Signaling in Glioblastoma Stem Cells

**Proteome analysis of OHSV-CD44 treatment.**

To evaluate the changes in protein expression in untreated and oHSV-CD44-treated glioma cells, we analyzed the changes in proteins in the infected cells using proteomics. We performed a protein differential expression analysis with a significance threshold of p < 0.05 and |log2(Fold change)|>1. According to the results of the volcano plot, the expression of 694 proteins was significantly reduced, while the expression of 275 proteins was upregulated considerably in GBM12 cells. And the expression of 669 proteins was significantly reduced, while the expression of 269 proteins was upregulated considerably in GBM28 cells (Supplementary Fig. 1A, C). GO enrichment analysis showed that the proteomic changes induced by oHSV-CD44 were significantly associated with ribonucleoprotein complex biogenesis, focal adhesion and cadherin binding in GBM 12 cells and were significantly associated with RNA splicing, focal adhesion and cadherin binding in GBM28 cells (Supplementary Fig. 1B, D).


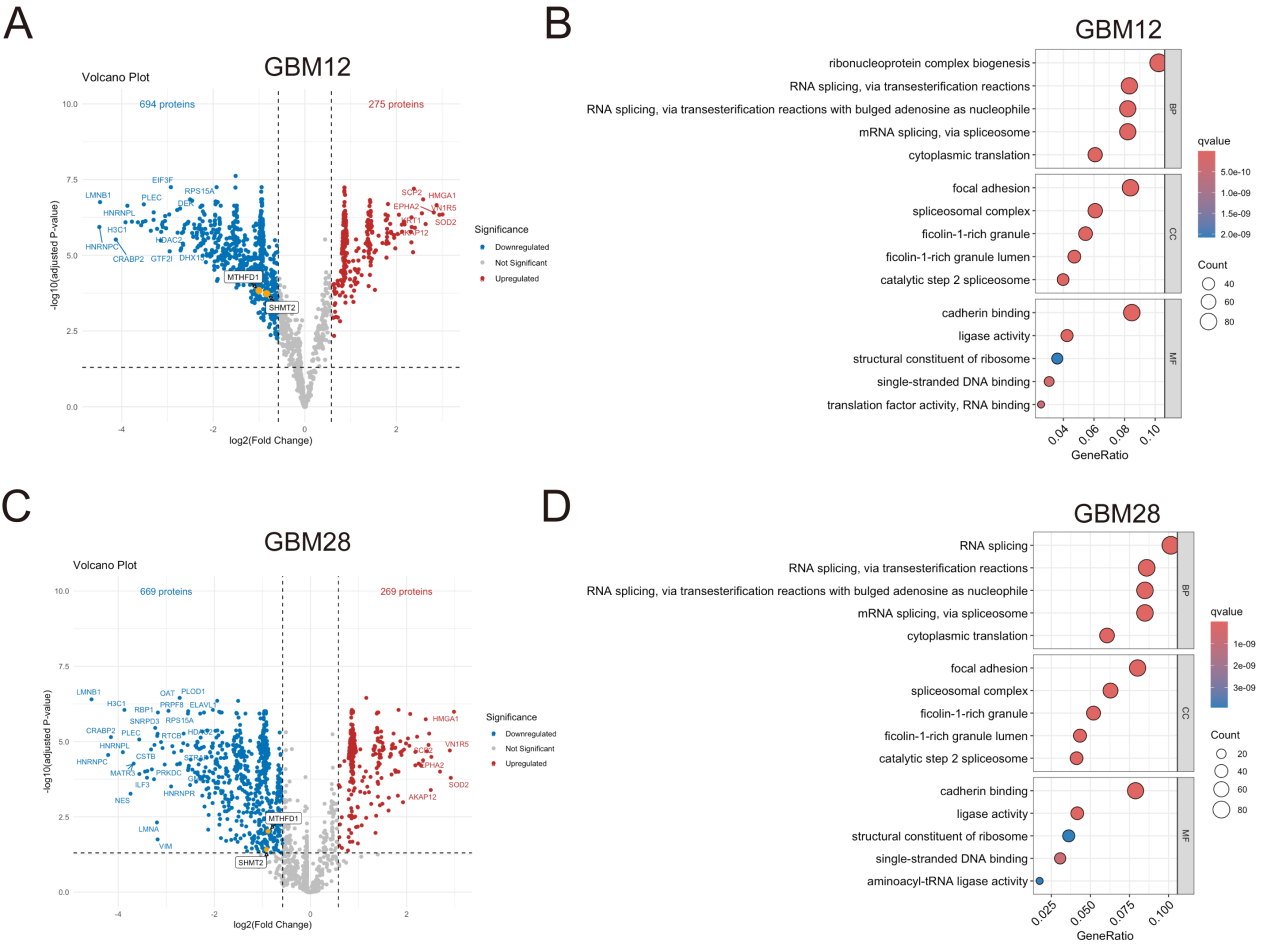


**Supplementary Fig.1 Proteome analysis of OHSV-CD44 treatment.** **A** Volcano plot illustrating differentially expressed proteins following OHSV-CD44 treatment in GBM12 cells, with red indicating significant upregulation, blue indicating significant downregulation, and gray indicating no significant change. **B** GO analysis of differentially expressed proteins in GBM12 cells. **C** Volcano plot illustrating differentially expressed proteins following OHSV-CD44 treatment in GBM28 cells, with red indicating significant upregulation, blue indicating significant downregulation, and gray indicating no significant change. **D** GO analysis of differentially expressed proteins in GBM12 cells.
